# Supplementary material for: Magneto-plasmonic bionanocomposites for on-site SERS detection of water contaminants
Source: Royal Society of Chemistry journal article supplement (doi:10.1039/d4sd00049h), 2024-01-01
Supplement: d4sd00049h1.pdf [file d4sd00049h1.pdf]

## Supplementary Information

### **Magneto-plasmonic bionanocomposites for on site SERS detection of water contaminants**

**Sofia F. Soares<sup>1</sup>, Nuno M. A. S. Silva<sup>1</sup>, João Brenheiro<sup>1</sup>, Sara Fateixa<sup>1</sup>, Ana L. Daniel-da-Silva<sup>1</sup> and Tito Trindade<sup>1\*</sup>**

<sup>1</sup>CICECO-Aveiro Institute of Materials and Department of Chemistry, University of Aveiro, 3810-193 Aveiro, Portugal

### A. Calibration curves

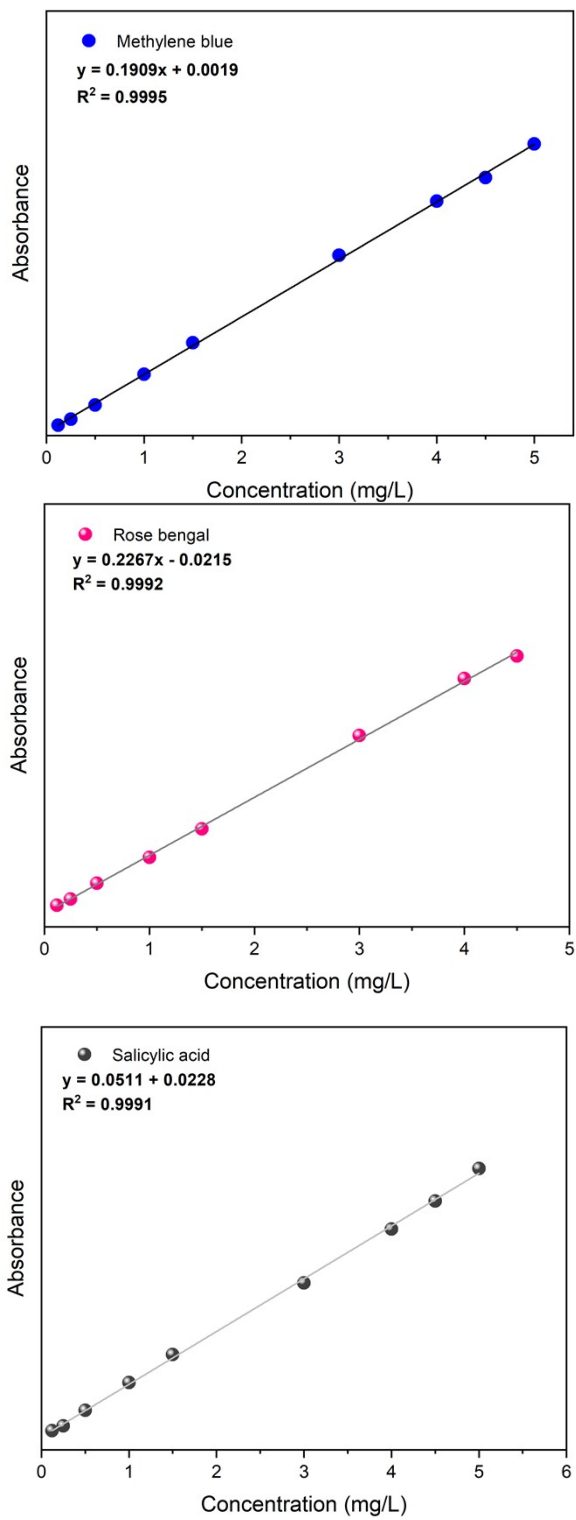

Fig. S1.  
Calibration

curves for methylene blue, rose bengal and salicylic acid in ultra-pure water, obtained by UV-VIS spectroscopy.

### **B. Materials characterization**

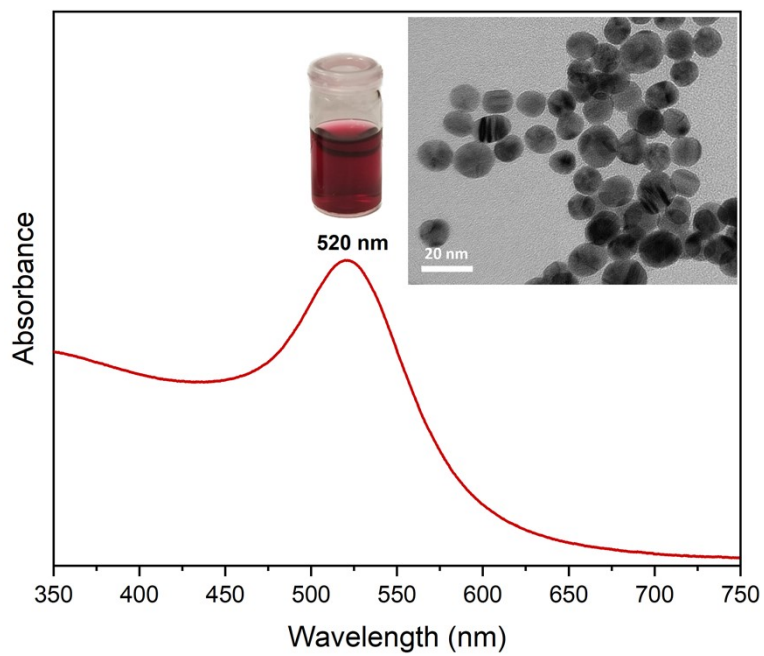

**Fig. S2.** UV-VIS absorption spectrum of colloidal Au nanoparticles. Inset: photograph of the Au colloid and TEM image of gold nanoparticles.

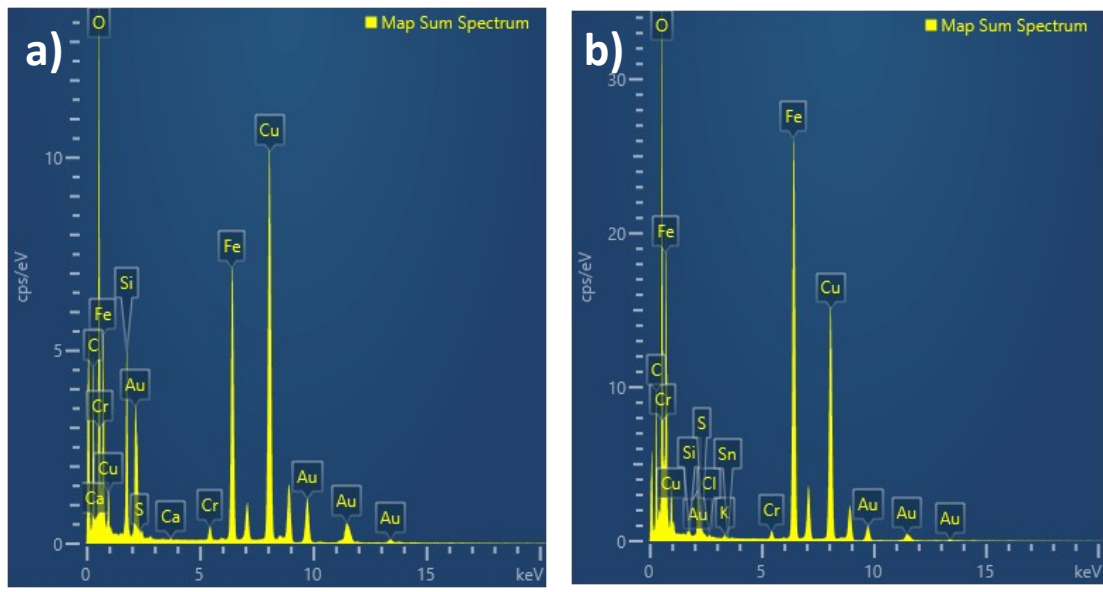

**Fig. S3.** EDS spectra of a) Fe<sub>3</sub>O<sub>4</sub>@SiO<sub>2</sub>/SiTMC/Au<sub>ex situ</sub> and b) Fe<sub>3</sub>O<sub>4</sub>@SiO<sub>2</sub>/SiTMC/Au<sub>in situ</sub> nanocomposites.

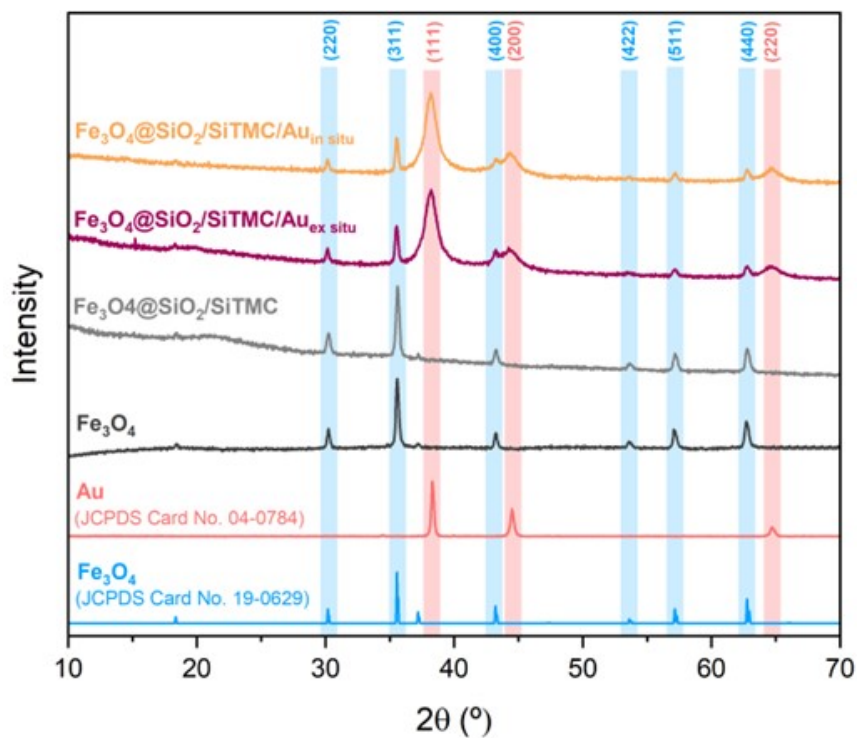

**Fig. S4.** XRD diffraction patterns of the synthesized materials:  $\text{Fe}_3\text{O}_4$ ,  $\text{Fe}_3\text{O}_4@SiO_2/SiTMC$ ,  $\text{Fe}_3\text{O}_4@SiO_2/SiTMC/Au_{ex\ situ}$  and  $\text{Fe}_3\text{O}_4@SiO_2/SiTMC/Au_{in\ situ}$  nanocomposites. For comparison purposes, reported diffractograms for crystalline gold with face centered structure (JCPDS Card No. 04-0784) and  $\text{Fe}_3\text{O}_4$  (JCPDS Card No. 19-0629) were also included.

### C. Dyes adsorption

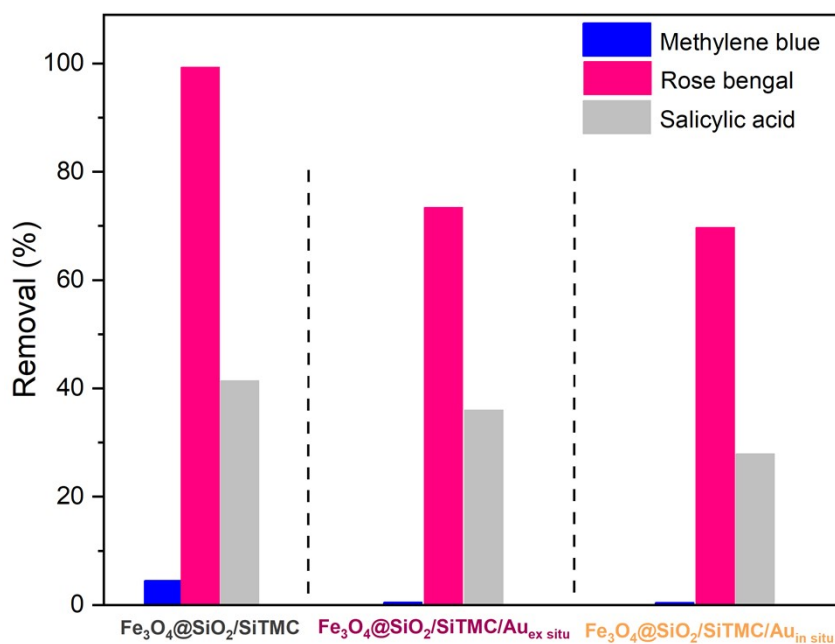

**Fig. S5.** Removal percentage of methylene blue, rose bengal and salicylic acid using  $\text{Fe}_3\text{O}_4@SiO_2/SiTMC$ ,  $\text{Fe}_3\text{O}_4@SiO_2/SiTMC/Au_{ex\ situ}$  and  $\text{Fe}_3\text{O}_4@SiO_2/SiTMC/Au_{in\ situ}$  particles (Conditions: adsorbent dose of 0.5 mg/mL, 4 h of contact time, initial concentration of  $1 \times 10^{-5}$  M,  $5 \times 10^{-5}$  M and  $1 \times 10^{-3}$  M for methylene blue, rose bengal and salicylic acid respectively).

#### D. SERS

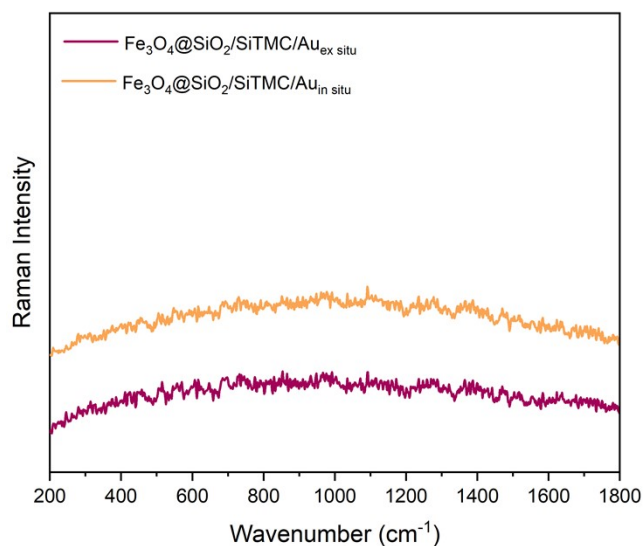

**Fig. S6.** Conventional Raman spectra of  $\text{Fe}_3\text{O}_4@\text{SiO}_2/\text{SiTMC}/\text{Au}_{\text{ex situ}}$  and  $\text{Fe}_3\text{O}_4@\text{SiO}_2/\text{SiTMC}/\text{Au}_{\text{in situ}}$  nanocomposites, under 633 nm laser excitation.

**Table S1:** Experimental Raman band positions (wavenumber,  $\text{cm}^{-1}$ ) for methylene blue (MB)<sup>1,2</sup>, rose bengal (RB)<sup>3,4</sup> and salicylic acid (SA)<sup>5,6</sup> with the corresponding vibrational mode assignments.

| Wavenumber ( $\text{cm}^{-1}$ ) | Vibrational modes                                                                                                                                                                                                                       |
|---------------------------------|-----------------------------------------------------------------------------------------------------------------------------------------------------------------------------------------------------------------------------------------|
| <b>MB</b>                       |                                                                                                                                                                                                                                         |
| 1621                            | $\nu(\text{CC}) + \delta_{\text{in-plane}}(\text{CH})$ (ring), $\nu(\text{CN}) + \nu(\text{CC})$                                                                                                                                        |
| 1430                            | $\delta_{\text{out-plane}}(\text{CH})$ , $\delta(\text{CH}_3)$ , $\nu(\text{CC})$ , $\nu_{\text{sym}}(\text{CN})$                                                                                                                       |
| 1396                            | $\nu_{\text{sym}}(\text{CN})$ (lateral and centre) + $\delta_{\text{in-plane}}(\text{CH})$ (ring) + $\delta_{\text{out-plane}}(\text{CH})$ , $\delta(\text{CH}_3)$ , $\nu(\text{CN}) + \nu(\text{CC})$ , $\nu_{\text{asym}}(\text{CN})$ |
| 1181                            | $\delta_{\text{in-plane}}(\text{CH})$ (ring) + $\delta_{\text{out-plane}}(\text{CH})$ , $\delta(\text{CH}_3)$ , $\delta_{\text{in-plane}}(\text{CH})$                                                                                   |
| 480                             | $\delta_{\text{in-plane}}$ thiazine (ring)                                                                                                                                                                                              |
| 448                             | Skeletal deformation (CN, CS and $\text{CH}_3$ ), CN skeletal deformation                                                                                                                                                               |
| <b>RB</b>                       |                                                                                                                                                                                                                                         |
| 1619                            | $\nu_{\text{sym}}(\text{C}=\text{C})$ (ring)                                                                                                                                                                                            |
| 1488                            | $\nu_{\text{asym}}(\text{C}=\text{C})$ (ring)                                                                                                                                                                                           |
| 1297                            | $\delta(\text{CCC})$ (ring) + $\delta(\text{C}-\text{H})$                                                                                                                                                                               |
| 614                             | $\nu(\text{C}-\text{I}) + \delta(\text{CCO})$                                                                                                                                                                                           |
| <b>SA</b>                       |                                                                                                                                                                                                                                         |
| 1625                            | $\nu(\text{C}=\text{O})$                                                                                                                                                                                                                |
| 1583                            | $\nu_{\text{asym}}(\text{OCO})$                                                                                                                                                                                                         |

|      |                                            |
|------|--------------------------------------------|
| 1390 | $\nu_{\text{sym}}(\text{OCO})$             |
| 1353 | $\delta(\text{C}_{\text{ring}}\text{-OH})$ |
| 1255 | $\nu(\text{C}_{\text{ring}}\text{-OH})$    |

---

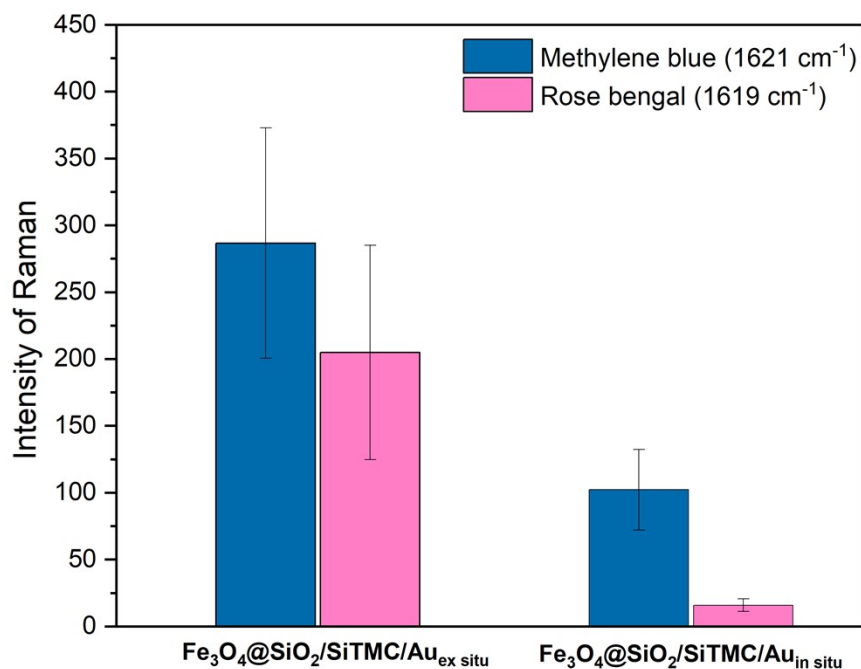

**Fig. S7.** Plot of the Raman intensities of selected vibrational bands of MB and RB, for comparing the SERS performance of the  $\text{Fe}_3\text{O}_4@SiO_2/SiTMC/Au_{\text{ex situ}}$  and  $\text{Fe}_3\text{O}_4@SiO_2/SiTMC/Au_{\text{in situ}}$  bionanocomposites (data from 5 random Raman spectra).

## References

- 1 S. Fateixa, M. Wilhelm, H. I. S. Nogueira and T. Trindade, *Journal of Raman Spectroscopy*, 2016, **47**, 1239–1246.
- 2 G.-N. Xiao and S.-Q. Man, *Chem Phys Lett*, 2007, **447**, 305–309.
- 3 Y. Xia, P. Padmanabhan, S. Sarangapani, B. Gulyás and M. Vadakke Matham, *Sci Rep*, 2019, **9**, 8497.
- 4 A. M. Gabudean, M. Focsan and S. Astilean, *The Journal of Physical Chemistry C*, 2012, **116**, 12240–12249.
- 5 J. L. Castro, J. F. Arenas, M. R. López-Ramírez, D. Peláez and J. C. Otero, *J Colloid Interface Sci*, 2009, **332**, 130–135.

- 6 S. Adomavičiūtė-Grabusovė, S. Ramanavičius, A. Popov, V. Šablinskas, O. Gogotsi and A. Ramanavičius, *Chemosensors*, 2021, **9**, 223.
